# Supplementary material for: Synthesis of metallasiloxanes of group 13–15 and their application in catalysis
Source: Royal Society of Chemistry journal article supplement (doi:10.1039/c3dt51408k), 2013-01-01
Supplement: c3dt51408k.pdf [file c3dt51408k.pdf]

Supporting Information

**Synthesis of Metallasiloxanes of Group 13-15 and Their  
 Application in Catalysis**

Yan Li<sup>a</sup>, Jinjin Wang<sup>a</sup>, Yile Wu<sup>a</sup>, Hongping Zhu<sup>\*a</sup>, Prinson P. Samuel<sup>b</sup> and Herbert W. Roesky<sup>\*b</sup>

<sup>a</sup> State Key Laboratory of Physical Chemistry of Solid Surfaces, National Engineering Laboratory for Green Chemical Productions of Alcohols–Ethers–Esters, College of Chemistry and Chemical Engineering, Xiamen University, Xiamen, Fujian, China. Tel: +8605922181912; E-mail: hpzhu@xmu.edu.cn

<sup>b</sup> Institut für Anorganische Chemie, Georg-August-Universität, Tammannstraße 4, 37077-Göttingen, Germany. Tel: +495513933001; E-mail: hroesky@gwdg.de

**I. Crystal data and structure refinement for compounds 1–6 (Table S1.)**

|                                                     | <b>1</b>                                                                                      | <b>2</b>                                                                                       | <b>3</b>                                                                                      |
|-----------------------------------------------------|-----------------------------------------------------------------------------------------------|------------------------------------------------------------------------------------------------|-----------------------------------------------------------------------------------------------|
| formula                                             | C <sub>40</sub> H <sub>78</sub> Bi <sub>2</sub> N <sub>4</sub> O <sub>4</sub> Si <sub>4</sub> | C <sub>64</sub> H <sub>118</sub> N <sub>4</sub> O <sub>8</sub> Sb <sub>2</sub> Si <sub>8</sub> | C <sub>48</sub> H <sub>89</sub> Ge <sub>2</sub> N <sub>3</sub> O <sub>6</sub> Si <sub>6</sub> |
| formula weight                                      | 1209.38                                                                                       | 1539.84                                                                                        | 1117.94                                                                                       |
| crystal system                                      | Triclinic                                                                                     | Triclinic                                                                                      | Hexagonal                                                                                     |
| space group                                         | <i>P</i> -1                                                                                   | <i>P</i> -1                                                                                    | <i>P</i> 6(3)                                                                                 |
| <i>a</i> /Å                                         | 9.819(2)                                                                                      | 9.7585(7)                                                                                      | 24.8315(3)                                                                                    |
| <i>b</i> /Å                                         | 11.045(3)                                                                                     | 14.3218(9)                                                                                     | 24.8315(3)                                                                                    |
| <i>c</i> /Å                                         | 13.189(3)                                                                                     | 14.4294(9)                                                                                     | 16.6832(3)                                                                                    |
| °/deg                                               | 111.32(2)                                                                                     | 82.922(5)                                                                                      | 90                                                                                            |
| °/deg                                               | 97.198(19)                                                                                    | 86.529(5)                                                                                      | 90                                                                                            |
| °/deg                                               | 101.63(2)                                                                                     | 86.857(5)                                                                                      | 120                                                                                           |
| <i>V</i> /Å <sup>3</sup>                            | 1273.9(5)                                                                                     | 1995.3(2)                                                                                      | 8908.7(2)                                                                                     |
| <i>Z</i>                                            | 1                                                                                             | 1                                                                                              | 6                                                                                             |
| $\rho_{\text{calcd}}/\text{g}\cdot\text{cm}^{-3}$   | 1.576                                                                                         | 1.281                                                                                          | 1.250                                                                                         |
| $\mu/\text{mm}^{-1}$                                | 7.030                                                                                         | 0.845                                                                                          | 1.177                                                                                         |
| <i>F</i> (000)                                      | 600                                                                                           | 808                                                                                            | 3564                                                                                          |
| crystal size/mm <sup>3</sup>                        | 0.20 × 0.10 × 0.05                                                                            | 0.30 × 0.15 × 0.12                                                                             | 0.38 × 0.35 × 0.25                                                                            |
| $\theta$ range/deg                                  | 2.87–26.00                                                                                    | 2.71–26.00                                                                                     | 2.79–25.00                                                                                    |
| index ranges                                        | –12 ≤ <i>h</i> ≤ 12<br>–13 ≤ <i>k</i> ≤ 13<br>–16 ≤ <i>l</i> ≤ 16                             | –12 ≤ <i>h</i> ≤ 11<br>–17 ≤ <i>k</i> ≤ 17<br>–17 ≤ <i>l</i> ≤ 17                              | –29 ≤ <i>h</i> ≤ 29<br>–29 ≤ <i>k</i> ≤ 29<br>–19 ≤ <i>l</i> ≤ 19                             |
| collected data                                      | 8581                                                                                          | 14836                                                                                          | 66089                                                                                         |
| unique data                                         | 4957<br>( <i>R</i> <sub>int</sub> = 0.1256)                                                   | 7821<br>( <i>R</i> <sub>int</sub> = 0.0454)                                                    | 10449<br>( <i>R</i> <sub>int</sub> = 0.0482)                                                  |
| completeness to $\theta$                            | 99.1%                                                                                         | 99.9%                                                                                          | 99.8%                                                                                         |
| data/restraints/parameters                          | 4957/187/284                                                                                  | 7821/0/404                                                                                     | 10449/150/547                                                                                 |
| GOF on <i>F</i> <sup>2</sup>                        | 0.956                                                                                         | 1.009                                                                                          | 1.215                                                                                         |
| final <i>R</i> indices [ <i>I</i> > 2σ( <i>I</i> )] | <i>R</i> <sub>1</sub> = 0.0800                                                                | <i>R</i> <sub>1</sub> = 0.0430                                                                 | <i>R</i> <sub>1</sub> = 0.0705                                                                |
| sigma( <i>I</i> )                                   | <i>wR</i> <sub>2</sub> = 0.1335                                                               | <i>wR</i> <sub>2</sub> = 0.0696                                                                | <i>wR</i> <sub>2</sub> = 0.1702                                                               |
| <i>R</i> indices (all data)                         | <i>R</i> <sub>1</sub> = 0.1278<br><i>wR</i> <sub>2</sub> = 0.1537                             | <i>R</i> <sub>1</sub> = 0.0597<br><i>wR</i> <sub>2</sub> = 0.0760                              | <i>R</i> <sub>1</sub> = 0.0935<br><i>wR</i> <sub>2</sub> = 0.1816                             |
| Largest diff peak/hole (e·Å <sup>-3</sup> )         | 2.393/–1.479                                                                                  | 0.531/–0.557                                                                                   | 2.742/–4.661                                                                                  |

|                                                   | <b>4</b>                                                                                      | <b>5·C<sub>7</sub>H<sub>8</sub>·0.5C<sub>6</sub>H<sub>14</sub></b>                              | <b>6·0.75THF</b>                                                                                   |
|---------------------------------------------------|-----------------------------------------------------------------------------------------------|-------------------------------------------------------------------------------------------------|----------------------------------------------------------------------------------------------------|
| formula                                           | C <sub>42</sub> H <sub>80</sub> Al <sub>2</sub> N <sub>2</sub> O <sub>6</sub> Si <sub>4</sub> | C <sub>70</sub> H <sub>119</sub> Bi <sub>4</sub> N <sub>4</sub> O <sub>12</sub> Si <sub>8</sub> | C <sub>93</sub> H <sub>176</sub> Al <sub>6</sub> N <sub>4</sub> O <sub>18.75</sub> Si <sub>8</sub> |
| formula weight                                    | 875.40                                                                                        | 2269.33                                                                                         | 2036.98                                                                                            |
| crystal system                                    | Triclinic                                                                                     | Monoclinic                                                                                      | Orthorhombic                                                                                       |
| 1space group                                      | <i>P</i> -1                                                                                   | <i>P</i> 2(1)/ <i>c</i>                                                                         | <i>P</i> 2(1)2(1)2(1)                                                                              |
| <i>a</i> /Å                                       | 10.273(2)                                                                                     | 15.5155(5)                                                                                      | 18.6059(5)                                                                                         |
| <i>b</i> /Å                                       | 11.090(2)                                                                                     | 21.6905(6)                                                                                      | 18.7005(5)                                                                                         |
| <i>c</i> /Å                                       | 12.605(3)                                                                                     | 27.1120(7)                                                                                      | 35.0951(11)                                                                                        |
| °deg                                              | 97.36(3)                                                                                      |                                                                                                 |                                                                                                    |
| °deg                                              | 97.64(3)                                                                                      | 92.249(3)                                                                                       |                                                                                                    |
| °deg                                              | 114.32(3)                                                                                     |                                                                                                 |                                                                                                    |
| <i>V</i> /Å <sup>3</sup>                          | 1270.1(4)                                                                                     | 9117.2(5)                                                                                       | 12211.0(6)                                                                                         |
| <i>Z</i>                                          | 1                                                                                             | 4                                                                                               | 4                                                                                                  |
| $\rho_{\text{calcd}}/\text{g}\cdot\text{cm}^{-3}$ | 1.144                                                                                         | 1.653                                                                                           | 1.108                                                                                              |
| $\mu/\text{mm}^{-1}$                              | 0.194                                                                                         | 7.854                                                                                           | 0.187                                                                                              |
| <i>F</i> (000)                                    | 476                                                                                           | 4428                                                                                            | 4408                                                                                               |
| crystal size/mm <sup>3</sup>                      | 0.30 × 0.20 × 0.19                                                                            | 0.20 × 0.05 × 0.05                                                                              | 0.40 × 0.40 × 0.20                                                                                 |
| $\theta$ range/deg                                | 3.04–26.00                                                                                    | 2.71–26.00                                                                                      | 2.70–26.00                                                                                         |
| index ranges                                      | −12 ≤ <i>h</i> ≤ 12<br>−13 ≤ <i>k</i> ≤ 13<br>−14 ≤ <i>l</i> ≤ 15                             | −19 ≤ <i>h</i> ≤ 19<br>−26 ≤ <i>k</i> ≤ 26<br>−33 ≤ <i>l</i> ≤ 29                               | −22 ≤ <i>h</i> ≤ 22<br>−22 ≤ <i>k</i> ≤ 23<br>−43 ≤ <i>l</i> ≤ 40                                  |
| collected data                                    | 10419                                                                                         | 65416                                                                                           | 90883                                                                                              |
| unique data                                       | 4893<br>( <i>R</i> <sub>int</sub> = 0.1024)                                                   | 17902<br>( <i>R</i> <sub>int</sub> = 0.1286)                                                    | 23933<br>( <i>R</i> <sub>int</sub> = 0.0915)                                                       |
| completeness to $\theta$                          | 98.0%                                                                                         | 99.9%                                                                                           | 99.7%                                                                                              |
| data/restraints/parameters                        | 4893/0/262                                                                                    | 17902/391/900                                                                                   | 23933/1246/1229                                                                                    |
| GOF on <i>F</i> <sup>2</sup>                      | 1.012                                                                                         | 1.014                                                                                           | 1.045                                                                                              |
| final <i>R</i> indices                            | <i>R</i> <sub>1</sub> = 0.0725                                                                | <i>R</i> <sub>1</sub> = 0.0664                                                                  | <i>R</i> <sub>1</sub> = 0.0793                                                                     |
| [ <i>I</i> > 2σ( <i>I</i> )]                      | <i>wR</i> <sub>2</sub> = 0.1384                                                               | <i>wR</i> <sub>2</sub> = 0.0958                                                                 | <i>wR</i> <sub>2</sub> = 0.1860                                                                    |
| <i>R</i> indices (all data)                       | <i>R</i> <sub>1</sub> = 0.1312<br><i>wR</i> <sub>2</sub> = 0.1565                             | <i>R</i> <sub>1</sub> = 0.1181<br><i>wR</i> <sub>2</sub> = 0.1092                               | <i>R</i> <sub>1</sub> = 0.1126<br><i>wR</i> <sub>2</sub> = 0.2045                                  |
| Largest diff peak/hole (e·Å <sup>-3</sup> )       | 0.347/−0.348                                                                                  | 1.499/−1.129                                                                                    | 0.838/−0.639                                                                                       |

<sup>a</sup> All data were collected at 173(2) K using Mo K $\alpha$  ( $\lambda = 0.71073$  Å) radiation.  $R_1 = \sum(|F_o| - |F_c|) / \sum|F_o|$ ,  $wR_2 = \{\sum[w(F_o^2 - F_c^2)^2 / \sum[w(F_o^2)^2]\}^{1/2}$ ,  $GOF = \{\sum[w(F_o^2 - F_c^2)^2] / (N_o - N_p)\}^{1/2}$ .

## II. Crystal structures of compounds 2 and 4

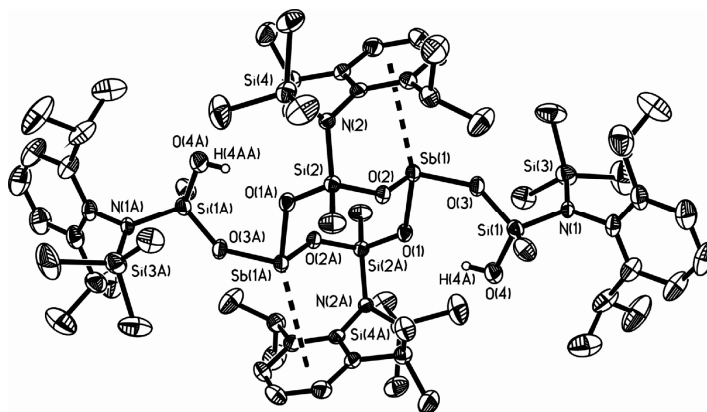

**Figure S1.** Thermal ellipsoid (50%) drawing of **2**. The H atoms are omitted for clarity except for the SiOH one. Sb...arene<sub>centroid</sub>: 3.312 Å.

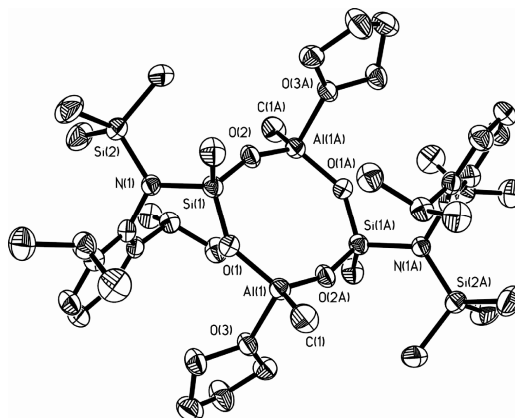

**Figure S2.** Thermal ellipsoid (50%) drawing of **4**. The H atoms are omitted for clarity.

### III. Table S2. Summary of important core bond parameters for complexes 1–6

| core                                                        | M–O (Å)           | Si–O (Å)           | O–M–O (°)           | O–Si–O (°)        |
|-------------------------------------------------------------|-------------------|--------------------|---------------------|-------------------|
| Si <sub>2</sub> O <sub>4</sub> Bi <sub>2</sub> in <b>1</b>  | 2.051(9)–2.075(9) | 1.629(9)–1.650(10) | 89.7(4)             | 112.6(6)          |
| Si <sub>2</sub> O <sub>4</sub> Sb <sub>2</sub> in <b>2</b>  | 1.937(2)–1.973(2) | 1.625(2)–1.643(2)  | 92.83(9)            | 108.22(12)        |
| Si <sub>3</sub> O <sub>6</sub> Ge <sub>2</sub> in <b>3</b>  | 1.717(6)–1.738(7) | 1.623(9)–1.641(8)  | 109.5(3)–110.5(4)   | 106.0(3)–107.2(5) |
| Si <sub>2</sub> O <sub>4</sub> Al <sub>2</sub> in <b>4</b>  | 1.711(3)–1.719(2) | 1.605(2)–1.611(2)  | 116.31(13)          | 112.08(13)        |
| Si <sub>4</sub> O <sub>12</sub> Bi <sub>4</sub> in <b>5</b> | 2.014(7)–2.071(7) | 1.598(7)–1.640(7)  | 89.8(3)–103.0(3)    | 108.1(4)–111.6(4) |
| Si <sub>3</sub> O <sub>6</sub> Al <sub>3</sub> in <b>6</b>  | 1.700(4)–1.731(4) | 1.603(4)–1.621(4)  | 113.92(19)–114.7(2) | 109.2(2)–110.9(2) |

### IV. Description of ring system of compounds 1-6

It can be seen that in the chair-like conformation of Si<sub>2</sub>O<sub>4</sub>Bi<sub>2</sub> in **1** and Si<sub>2</sub>O<sub>4</sub>Sb<sub>2</sub> in **2** the two metal centers are deviated from the Si<sub>2</sub>O<sub>4</sub> plane by  $\pm 1.2242$  and  $\pm 1.1881$  Å, respectively. However, in **5** the conformation of Si<sub>2</sub>O<sub>4</sub>Bi<sub>2</sub> changes with respect to the slightly distorted Si<sub>2</sub>O<sub>4</sub> plane ( $\Delta_{\text{Si}_2\text{O}_4} = 0.1503$  Å) although its chair-like shape is retained. In **4** a flat chair-like conformation of Si<sub>2</sub>O<sub>4</sub>Al<sub>2</sub> is shown with the two metal centers away from the Si<sub>2</sub>O<sub>4</sub> plane ( $\Delta_{\text{Si}_2\text{O}_4} = 0.0505$  Å) by  $\pm 0.3104$  Å. But, when assembled into a bicyclic structure (in **6**), a boat-like conformation of the same ring is formed significantly different from that in **4**. A boat-like Si<sub>2</sub>O<sub>4</sub>Ge<sub>2</sub> conformation is also present in the bicyclic structure of **3**. Apparently, the Si<sub>2</sub>O<sub>4</sub>M<sub>2</sub> rings in **1–6** adopt different conformations owing to the different metals anchored. We pictured such rings in a lateral projecting view in Figure S3.

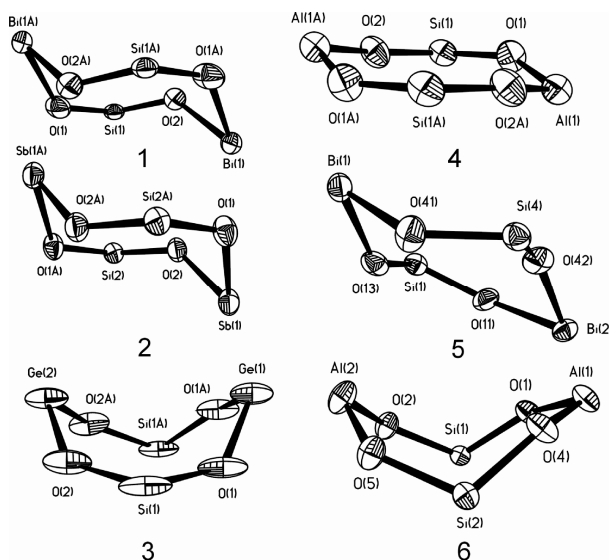

**Figure S3.** Lateral projecting view of the ring system of compounds 1-6

## V. The completed results of compounds 1-6 as catalysts

**Table S3.** Addition reaction of TMSCN to benzaldehyde catalyzed by 1–6<sup>a</sup>

| Cat.     | Reaction time | Yield <sup>b</sup> (%) |
|----------|---------------|------------------------|
| <b>1</b> | 5 min         | ≥ 99                   |
| <b>2</b> | 60 min        | 95                     |
| <b>3</b> | 60 min        | ≥ 99                   |
| <b>4</b> | 5 min         | ≥ 99                   |
| <b>5</b> | 5 min         | ≥ 99                   |
| <b>6</b> | 5 min         | ≥ 99                   |

<sup>a</sup> Benzaldehyde, 2 mmol; TMSCN, 3 mmol; catalyst, 0.02 mmol; at ambient temperature. <sup>b</sup> Yield was obtained according to Thin-Layer Chromatographic (TLC) and <sup>1</sup>H NMR spectral analysis.

The reaction of TMSCN with benzaldehyde was carried out in the presence of **1–6** (1 mol%, based on benzaldehyde) at ambient temperature in solvent-free condition. The results shown in Table S3 reveal that all the compounds **1–6** are catalytically active. The reactions approach completeness in 5 min to afford the product 2-trimethylsilyloxy-2-phenylacetonitrile when the bismuth(III) (**1**, **5**) and aluminum(III) (**4**, **6**) compounds are used as catalysts. However, the use of the antimony(III) (**2**) and germanium(IV) (**3**) compounds results in the respective yields of 95% and ≥ 99% of the product in 60 min. It has been reported that under similar conditions SbCl<sub>3</sub> catalyzed this reaction to afford the product in 30–90% yields within 30–240 min by loading amounts of 4.4–26 mol%. In the presence of organic solvent such as THF, ethyl acetate, ethanol, acetonitrile, dichloromethane, and *n*-hexane, lower yields of the product were achieved (0–50% yields, 15–300 min, 17 mol% loading).<sup>S1</sup> The bismuth(III)

halide and aryl compounds are also reported to catalyze this reaction and yield of the product depends on the nature of substituent at the bismuth center.<sup>S2</sup> In addition, the alumatranes ((AIL)<sub>2</sub> and (PhCHO)AIL (L = tris(2-oxy-3,5-dimethylbenzyl)amine) are also known to be catalytically active for this reaction but the reaction was slow even with a high loading.<sup>S3</sup> However, **3** as a germanium(IV) compound is tested for the first time to show such catalytic property although heavier tin(IV) compounds such as SnCl<sub>4</sub> or R<sub>2</sub>SnCl<sub>2</sub> (R = *n*Bu, Ph) are documented to exhibit good catalytic activities.<sup>S4</sup> Comparatively, compounds **1–6** are effective catalysts for the addition reaction of TMSCN to benzaldehyde, of which the bismuth (**1** and **5**) and aluminum (**4** and **6**) compounds appear to be the best. Verkade et al. have well studied the catalytic properties of alumatranes by characterizing the possible interaction complexes on X-ray crystallography.<sup>S3a</sup> Among **1** and **4–6**, compound **5** is homoleptic with a cage structure having the bismuth(III)⋯arene  $\pi$ -interactions which appears comparable to those of the alumatranes. This prompted us to select **5** as the catalyst for further investigations.

## VI General procedures for the catalytic reactions of trimethylsilyl cyanide (TMSCN) with aldehyde or ketone.

Under N<sub>2</sub> atmosphere, a mixture of aldehyde or ketone (2 mmol), TMSCN (3mmol), and catalytic amount of the catalyst was stirred at room temperature. The reaction time was controlled within 5 min for quickly-done reactions or with a desired time to get satisfied result for relatively slow or slow reactions. The reaction progress was detected by combination of the Thin-Layer Chromatography (TLC) on 0.25 mm Merck silica gel sheets (60F-254) (4×2 cm<sup>2</sup>) equipped with UV light and the <sup>1</sup>H NMR spectral analysis. After workup, the mixture was allowed to directly pass through a silica-gel column using a mixture of petroleum ether and ethyl acetate (20:1) as an eluent. The eluents were collected and then evaporated to dryness to give the desired product that was studied by NMR (<sup>1</sup>H, <sup>13</sup>C, and <sup>29</sup>Si) and yield calculation.

**C<sub>6</sub>H<sub>5</sub>CH(CN)OTMS.** A colorless oil, 99% yield. <sup>1</sup>H NMR (500 MHz, CDCl<sub>3</sub>, 298 K, ppm):  $\delta$  7.50–7.40 (m, 5 H, C<sub>6</sub>H<sub>5</sub>), 5.51 (s, 1 H, CH), 0.24 (s, 9 H, OSiMe<sub>3</sub>). <sup>13</sup>C NMR (125 MHz, CDCl<sub>3</sub>, 298 K, ppm):  $\delta$  136.2, 129.2, 128.8, 126.2 (C<sub>6</sub>H<sub>5</sub>), 119.1 (CN), 63.5 (CH), –0.4 (OSiMe<sub>3</sub>). <sup>29</sup>Si (99 MHz, CDCl<sub>3</sub>, 298 K, ppm):  $\delta$  24.7 (OSiMe<sub>3</sub>).

***o*-Br-C<sub>6</sub>H<sub>4</sub>CH(CN)OTMS.** A colorless oil, 89% yield. <sup>1</sup>H NMR (500 MHz, CDCl<sub>3</sub>, 298 K, ppm):  $\delta$  7.74 (m, 1 H), 7.58 (m, 1 H), 7.42 (m, 1 H), 7.27 (m, 1 H) (C<sub>6</sub>H<sub>4</sub>), 5.78 (s, 1 H, CH), 0.27 (s, 9 H, OSiMe<sub>3</sub>). <sup>13</sup>C NMR (125 MHz, CDCl<sub>3</sub>, 298 K, ppm):  $\delta$  135.4, 132.9, 130.8, 128.5, 128.1, 121.6 (C<sub>6</sub>H<sub>4</sub>), 118.2 (CN), 63.1 (CH), –0.4 (OSiMe<sub>3</sub>). <sup>29</sup>Si (99 MHz, CDCl<sub>3</sub>, 298 K, ppm):  $\delta$  25.7 (OSiMe<sub>3</sub>).

***p*-MeO-C<sub>6</sub>H<sub>4</sub>CH(CN)OTMS.** A colorless oil, 99% yield. <sup>1</sup>H NMR (500 MHz, CDCl<sub>3</sub>, 298 K, ppm):  $\delta$  7.39 (d, 2 H), 6.94 (d, 2 H) (C<sub>6</sub>H<sub>4</sub>), 5.44 (s, 1 H, CH), 3.83 (s, 3 H, OMe), 0.22 (s, 9 H, OSiMe<sub>3</sub>). <sup>13</sup>C NMR (125 MHz, CDCl<sub>3</sub>, 298 K, ppm):  $\delta$  160.2, 128.4, 127.8, 114.2, 114.1 (C<sub>6</sub>H<sub>4</sub>), 119.2 (CN), 63.2 (CH), 55.1 (OMe), –0.4 (OSiMe<sub>3</sub>). <sup>29</sup>Si (99 MHz, CDCl<sub>3</sub>, 298 K,

ppm):  $\delta$  24.1 (OSiMe<sub>3</sub>).

**2-TMSO-C<sub>6</sub>H<sub>4</sub>CH(CN)OTMS.** A colorless oil, 99% yield. <sup>1</sup>H NMR (500 MHz, CDCl<sub>3</sub>, 298 K, ppm):  $\delta$  7.58–7.56 (m, 1 H), 7.28–7.25 (m, 1 H), 7.05–7.02 (m, 1 H), 6.86–6.84 (m, 1 H) (C<sub>6</sub>H<sub>4</sub>), 5.74 (m, 1 H, CH), 0.37 (s, 9 H, OSiMe<sub>3</sub> (ligated to aryl)), 0.24 (s, 9 H, OSiMe<sub>3</sub> (ligated to CH)). <sup>13</sup>C NMR (125 MHz, CDCl<sub>3</sub>, 298 K, ppm):  $\delta$  152.1, 130.1, 127.7, 126.9, 121.5, 118.1 (C<sub>6</sub>H<sub>4</sub>), 119.2 (CN), 58.5 (CH), 0.32 (OSiMe<sub>3</sub> (ligated to aryl)), –0.43 (OSiMe<sub>3</sub> (ligated to CH)). <sup>29</sup>Si (99 MHz, CDCl<sub>3</sub>, 298 K, ppm):  $\delta$  24.1(OSiMe<sub>3</sub> (ligated to aryl), 21.6 (OSiMe<sub>3</sub> (ligated to CH))).

**C<sub>6</sub>H<sub>5</sub>CH=CHCH(CN)OTMS.** A colorless oil, 99% yield. <sup>1</sup>H NMR (500 MHz, CDCl<sub>3</sub>, 298 K, ppm):  $\delta$  7.44–7.31 (m, 5 H, C<sub>6</sub>H<sub>5</sub>), 6.84 (d, 1 H, C<sub>6</sub>H<sub>5</sub>CH=CH), 6.22 (dd, 1 H, C<sub>6</sub>H<sub>5</sub>CH=CH), 5.14 (m, 1 H, CH), 0.29 (s, 9 H, OSiMe<sub>3</sub>). <sup>13</sup>C NMR (125 MHz, CDCl<sub>3</sub>, 298 K, ppm):  $\delta$  135.0, 133.9, 128.7, 128.6, 126.9, 123.5 (C<sub>6</sub>H<sub>5</sub>CH=CH), 118.3 (CN), 62.2 (CH), –0.19 (OSiMe<sub>3</sub>). <sup>29</sup>Si (99 MHz, CDCl<sub>3</sub>, 298 K, ppm):  $\delta$  24.5 (OSiMe<sub>3</sub>).

**CH<sub>3</sub>CH=CHCH(CN)OTMS.** A colorless oil, 99% yield. <sup>1</sup>H NMR (500 MHz, CDCl<sub>3</sub>, 298 K, ppm):  $\delta$  5.96 (m, 1 H, CH<sub>3</sub>CH=CH), 5.55 (m, 1 H, CH<sub>3</sub>CH=CH), 4.88 (m, 1 H, CH), 1.76 (m, 3 H, CH<sub>3</sub>), 0.21 (s, 9 H, OSiMe<sub>3</sub>). <sup>13</sup>C NMR (125 MHz, CDCl<sub>3</sub>, 298 K, ppm):  $\delta$  131.0 (CH<sub>3</sub>CH=CH), 126.2 (CH<sub>3</sub>CH=CH), 118.6 (CN), 62.0 (CH), 17.3 (CH<sub>3</sub>), –0.3 (OSiMe<sub>3</sub>). <sup>29</sup>Si (99 MHz, CDCl<sub>3</sub>, 298 K, ppm):  $\delta$  23.9 (OSiMe<sub>3</sub>).

**CH<sub>3</sub>CH<sub>2</sub>CH(CN)OTMS.** A colorless oil, 99% yield. <sup>1</sup>H NMR (500 MHz, CDCl<sub>3</sub>, 298 K, ppm):  $\delta$  4.35 (t, 1 H, CH), 1.81 (m, 2 H, CH<sub>2</sub>), 1.03 (t, 3 H, CH<sub>3</sub>), 0.20 (s, 9 H, OSiMe<sub>3</sub>). <sup>13</sup>C NMR (125 MHz, CDCl<sub>3</sub>, 298 K, ppm):  $\delta$  119.8 (CN), 62.6 (CH), 29.5 (CH<sub>2</sub>), 8.8 (CH<sub>3</sub>), –0.5 (OSiMe<sub>3</sub>). <sup>29</sup>Si (99 MHz, CDCl<sub>3</sub>, 298 K, ppm):  $\delta$  23.2 (OSiMe<sub>3</sub>).

**CH<sub>3</sub>CH(Me)CH<sub>2</sub>CH(CN)OTMS.** A colorless oil, 99% yield. <sup>1</sup>H NMR (500 MHz, CDCl<sub>3</sub>, 298 K, ppm):  $\delta$  4.42 (dd, 1 H, CH (ligated to OTMS)), 1.83 (m, 1 H, CH (ligated to Me)), 1.73 (m, 1 H), 1.63 (m, 1 H) (CH<sub>2</sub>), 0.95 (d, 3 H), 0.93 (d, 3 H) (CH<sub>3</sub>, Me), 0.20 (s, 9 H, OSiMe<sub>3</sub>). <sup>13</sup>C NMR (125 MHz, CDCl<sub>3</sub>, 298 K, ppm):  $\delta$  120.2 (CN), 59.9 (CH (ligated to OTMS)), 44.9 (CH<sub>2</sub>), 24.1, 22.4, 21.8 (CH (ligated to Me), CH<sub>3</sub>), –0.5 (OSiMe<sub>3</sub>). <sup>29</sup>Si (99 MHz, CDCl<sub>3</sub>, 298 K, ppm):  $\delta$  23.1 (OSiMe<sub>3</sub>).

**CH<sub>3</sub>(CH<sub>2</sub>)<sub>7</sub>CH<sub>2</sub>CH(CN)OTMS.** A colorless oil, 99% yield. <sup>1</sup>H NMR (500 MHz, CDCl<sub>3</sub>, 298 K, ppm):  $\delta$  4.38 (t, 1 H, CH), 1.80–1.75 (m, 2 H, CH<sub>3</sub>(CH<sub>2</sub>)<sub>7</sub>CH<sub>2</sub>), 1.48–1.27 (m, 14 H, CH<sub>3</sub>(CH<sub>2</sub>)<sub>7</sub>CH<sub>2</sub>), 0.88 (t, 3 H, CH<sub>3</sub>), 0.21 (s, 9 H, OSiMe<sub>3</sub>). <sup>13</sup>C NMR (125 MHz, CDCl<sub>3</sub>, 298 K, ppm):  $\delta$  120.0 (CN), 61.4 (CH), 36.2, 31.8, 29.4, 29.3, 29.2, 28.9, 24.5, 22.6, 14.0 (CH<sub>3</sub>(CH<sub>2</sub>)<sub>7</sub>CH<sub>2</sub>), –0.5 (OSiMe<sub>3</sub>). <sup>29</sup>Si (99 MHz, CDCl<sub>3</sub>, 298 K, ppm):  $\delta$  24.7 (OSiMe<sub>3</sub>).

**Cl<sub>3</sub>CCH(CN)OTMS.** A colorless oil, 99% yield. <sup>1</sup>H NMR (500 MHz, CDCl<sub>3</sub>, 298 K, ppm):  $\delta$  4.87 (s, 1 H, CH), 0.08 (s, 9 H, OSiMe<sub>3</sub>). <sup>13</sup>C NMR (125 MHz, CDCl<sub>3</sub>, 298 K, ppm):  $\delta$  115.0 (CN), 96.6 (Cl<sub>3</sub>C), 75.0 (CH), –0.5 (OSiMe<sub>3</sub>). <sup>29</sup>Si (99 MHz, CDCl<sub>3</sub>, 298 K, ppm):  $\delta$  24.4 (OSiMe<sub>3</sub>).

**2-C<sub>4</sub>H<sub>3</sub>S-CH(CN)OTMS.** A colorless oil, 99% yield. <sup>1</sup>H NMR (500 MHz, CDCl<sub>3</sub>, 298 K, ppm): δ 7.37 (d, 1 H), 7.20 (t, 1 H), 7.01 (m, 1 H) (C<sub>4</sub>H<sub>3</sub>S), 5.75 (s, 1 H, CH), 0.25 (s, 9 H, OSiMe<sub>3</sub>). <sup>13</sup>C NMR (125 MHz, CDCl<sub>3</sub>, 298 K, ppm): δ 139.5, 127.1, 126.8, 126.2 (C<sub>4</sub>H<sub>3</sub>S), 118.2 (CN), 59.5 (CH), -0.4 (OSiMe<sub>3</sub>). <sup>29</sup>Si (99 MHz, CDCl<sub>3</sub>, 298 K, ppm): δ 25.3 (OSiMe<sub>3</sub>).

**2-C<sub>4</sub>H<sub>3</sub>O-CH(CN)OTMS.** A colorless oil, 77% yield. <sup>1</sup>H NMR (500 MHz, CDCl<sub>3</sub>, 298 K, ppm): δ 7.46 (m, 1 H), 6.54 (m, 1 H), 6.40 (m, 1 H) (C<sub>4</sub>H<sub>3</sub>O), 5.55 (s, 1 H, CH), 0.20 (s, 9 H, OSiMe<sub>3</sub>). <sup>13</sup>C NMR (125 MHz, CDCl<sub>3</sub>, 298 K, ppm): δ 148.3, 143.8, 110.8, 109.7 (C<sub>4</sub>H<sub>3</sub>O), 117.1 (CN), 57.4 (CH), -0.4 (OSiMe<sub>3</sub>). <sup>29</sup>Si (99 MHz, CDCl<sub>3</sub>, 298 K, ppm): δ 25.0 (OSiMe<sub>3</sub>).

**2-C<sub>4</sub>H<sub>3</sub>N(TMS)-CH(CN)OTMS.** A colorless oil, 13% yield. <sup>1</sup>H NMR (500 MHz, CDCl<sub>3</sub>, 298 K, ppm): δ 6.87–6.86 (m, 1 H), 6.56–6.55 (m, 1 H), 6.24–6.23 (m, 1 H) (C<sub>4</sub>H<sub>3</sub>N), 5.65 (s, 1 H, CH), 0.51 (s, 9 H, NSiMe<sub>3</sub>), 0.20 (s, 9 H, OSiMe<sub>3</sub>). <sup>13</sup>C NMR (125 MHz, CDCl<sub>3</sub>, 298 K, ppm): δ 131.4, 127.3, 114.2, 110.1 (C<sub>4</sub>H<sub>3</sub>N), 118.7 (CN), 58.3 (CH), 1.0 (NSiMe<sub>3</sub>), -0.01 (OSiMe<sub>3</sub>). <sup>29</sup>Si (99 MHz, CDCl<sub>3</sub>, 298 K, ppm): δ 24.1 (NSiMe<sub>3</sub>), 21.6 (OSiMe<sub>3</sub>).

**C<sub>6</sub>H<sub>5</sub>CMe(CN)OTMS.** A colorless oil, 99% yield. <sup>1</sup>H NMR (500 MHz, CDCl<sub>3</sub>, 298 K, ppm): δ 7.58–7.32 (m, 5 H, C<sub>6</sub>H<sub>5</sub>), 1.88 (s, 3 H, CMe), 0.20 (s, 9 H, OSiMe<sub>3</sub>). <sup>13</sup>C NMR (125 MHz, CDCl<sub>3</sub>, 298 K, ppm): δ 142.0, 128.6, 124.6 (C<sub>6</sub>H<sub>5</sub>), 121.6 (CN), 71.6 (CMe), 33.5 (CMe), 1.0 (OSiMe<sub>3</sub>). <sup>29</sup>Si (99 MHz, CDCl<sub>3</sub>, 298 K, ppm): δ 20.4 (OSiMe<sub>3</sub>).

**4-MeO-C<sub>6</sub>H<sub>4</sub>CMe(CN)OTMS.** A colorless oil, 68% yield. <sup>1</sup>H NMR (500 MHz, CDCl<sub>3</sub>, 298 K, ppm): δ 7.47 (d, 2 H), 6.92 (d, 2 H) (C<sub>6</sub>H<sub>4</sub>), 3.83 (s, 3 H, OMe), 1.86 (s, 3 H, CMe), 0.17 (s, 9 H, OSiMe<sub>3</sub>). <sup>13</sup>C NMR (125 MHz, CDCl<sub>3</sub>, 298 K, ppm): δ 159.8, 134.0, 126.0, 113.9 (C<sub>6</sub>H<sub>4</sub>), 121.7 (CN), 71.2 (CMe), 33.4 (OMe), 1.0 (OSiMe<sub>3</sub>). <sup>29</sup>Si (99 MHz, CDCl<sub>3</sub>, 298 K, ppm): δ 20.0 (OSiMe<sub>3</sub>).

**(CH<sub>3</sub>CH<sub>2</sub>)<sub>2</sub>C(CN)OTMS.** A colorless oil, 80% yield. <sup>1</sup>H NMR (500 MHz, CDCl<sub>3</sub>, 298 K, ppm): δ 1.76 (td, 4 H, CH<sub>3</sub>CH<sub>2</sub>), 1.03 (t, 6 H, CH<sub>3</sub>CH<sub>2</sub>), 0.24 (s, 9 H, OSiMe<sub>3</sub>). <sup>13</sup>C NMR (125 MHz, CDCl<sub>3</sub>, 298 K, ppm): δ 121.4 (CN), 74.3 (CCN), 33.5 (CH<sub>3</sub>CH<sub>2</sub>), 8.3 (CH<sub>3</sub>CH<sub>2</sub>), 1.2 (OSiMe<sub>3</sub>). <sup>29</sup>Si (99 MHz, CDCl<sub>3</sub>, 298 K, ppm): δ 17.5 (OSiMe<sub>3</sub>).

## VII. Proposed mechanism for the addition reaction of TMSCN to aldehyde or ketone to form cyanohydrin trimethylsilyl ethers catalyzed by 5. (Scheme S1)

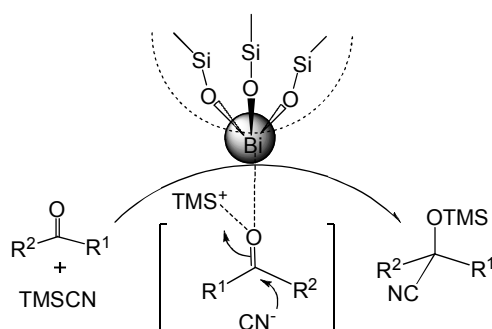

## References

- S1 S. A. Pourmousavi and H. Salahshornia, *Bull. Korean Chem. Soc.* 2011, **32**, 1575–1578.
- S2 (a) N. Komatsu, M. Uda, H. Suzuki, T. Takahashi, T. Domae and M. Wada, *Tetrahedron Lett.* 1997, **38**, 7215–7218; (b) M. Wada, T. Takahashi, T. Domae, T. Fukuma, N. Miyoshi and K. Smith, *Tetrahedron: Asymmetry* 1997, **8**, 3939–3946.
- S3 (a) W. Su, Y. Kim, A. Ellern, I. A. Guzei and J. G. Verkade, *J. Am. Chem. Soc.* 2006, **128**, 13727–13737; (b) S. M. Raders and J. G. Verkade, *Tetrahedron Lett.* 2009, **50**, 5317–5321.
- S4 (a) M. T. Reetz, M. W. Drewes, K. Harms and W. Reif, *Tetrahedron Lett.* 1988, **29**, 3295–3298; (b) J. K. Whitesell and R. Apodaca, *Tetrahedron Lett.* 1996, **37**, 2525–2528.
